# Supplementary material for: Time to Step Up Conservation: Climate Change Will Further Reduce the Suitable Habitats for the Vulnerable Species Marbled Polecat (Vormela peregusna)
Source: MDPI journal article supplement (doi:10.3390/ani13142341), 2023-07-18

Supplementary materials for

**Time to Step up Conservation: Climate Change Will Further Reduce the Suitable Habitats for the Vulnerable Species Marbled Polecat (*Vormela peregusna*)**

**Xiaotian Cheng<sup>1</sup>, Yamin Han<sup>1</sup>, Jun Lin<sup>2</sup>, Fan Jiang<sup>3</sup>, Qi Cai<sup>4</sup>, Yong Shi<sup>3</sup>, Dongyang Cui<sup>3</sup> and Xuanye Wen<sup>3,\*</sup>**

<sup>1</sup> The Station of Forest Seedling Quarantine and Pest Management, 831100 Changji, China;  
chengxiaotian8862@163.com (X.C.); hym0727@126.com (Y.H.)

<sup>2</sup> Locust and Rodent Control Headquarters of Xinjiang Uygur Autonomous Region, 830000 Urumqi, China; jun\_lin2013@163.com

<sup>3</sup> Center for Biological Disaster Prevention and Control, National Forestry and Grassland Administration, 110031 Shenyang, China; jiangfan930430@163.com (F.J.); yshisyau@163.com (Y.S.); cuidy@bdpc.org.cn (D.C.)

<sup>4</sup> Institute of Ecological Conservation and Restoration, Chinese Academy of Forestry, 100091 Beijing, China;  
caiqilinda1010@126.com

\* Correspondence: wenxuanye\_1116@163.com; Tel.: +86-186-0440-0387

**Talbe S1. Distribution points of *Vormela peregusna***

| Number | Species                  | Longitude | Latitude  |
|--------|--------------------------|-----------|-----------|
| 1      | <i>Vormela peregusna</i> | 35.043    | 32.61     |
| 2      | <i>Vormela peregusna</i> | 34.941    | 32.516    |
| 3      | <i>Vormela peregusna</i> | 34.436    | 30.899    |
| 4      | <i>Vormela peregusna</i> | 35.137    | 32.837    |
| 5      | <i>Vormela peregusna</i> | 35.576    | 32.881    |
| 6      | <i>Vormela peregusna</i> | 35.57     | 33.207    |
| 7      | <i>Vormela peregusna</i> | 35.53     | 32.97     |
| 8      | <i>Vormela peregusna</i> | 34.97     | 32.467    |
| 9      | <i>Vormela peregusna</i> | 34.87     | 31.38     |
| 10     | <i>Vormela peregusna</i> | 34.92     | 32.53     |
| 11     | <i>Vormela peregusna</i> | 34.91     | 32.28     |
| 12     | <i>Vormela peregusna</i> | 34.82     | 31.214    |
| 13     | <i>Vormela peregusna</i> | 44.39222  | 35.46806  |
| 14     | <i>Vormela peregusna</i> | 28.938777 | 45.15925  |
| 15     | <i>Vormela peregusna</i> | 28.875195 | 45.160312 |
| 16     | <i>Vormela peregusna</i> | 28.811609 | 45.161338 |
| 17     | <i>Vormela peregusna</i> | 28.55357  | 45.030113 |
| 18     | <i>Vormela peregusna</i> | 28.749398 | 45.207317 |
| 19     | <i>Vormela peregusna</i> | 28.875195 | 45.160312 |
| 20     | <i>Vormela peregusna</i> | 28.487788 | 44.940968 |
| 21     | <i>Vormela peregusna</i> | 29.187908 | 45.019718 |
| 22     | <i>Vormela peregusna</i> | 28.177446 | 45.259656 |
| 23     | <i>Vormela peregusna</i> | 28.305904 | 45.303267 |
| 24     | <i>Vormela peregusna</i> | 29.187908 | 45.019718 |
| 25     | <i>Vormela peregusna</i> | 29.267361 | 45.423246 |

|    |                          |           |           |
|----|--------------------------|-----------|-----------|
| 26 | <i>Vormela peregusna</i> | 28.938777 | 45.15925  |
| 27 | <i>Vormela peregusna</i> | 28.033013 | 44.315806 |
| 28 | <i>Vormela peregusna</i> | 28.472906 | 44.355995 |
| 29 | <i>Vormela peregusna</i> | 28.65348  | 44.083429 |
| 30 | <i>Vormela peregusna</i> | 28.662328 | 44.39841  |
| 31 | <i>Vormela peregusna</i> | 28.582676 | 43.769306 |
| 32 | <i>Vormela peregusna</i> | 28.546316 | 44.760146 |
| 33 | <i>Vormela peregusna</i> | 28.662328 | 44.39841  |
| 34 | <i>Vormela peregusna</i> | 28.650979 | 43.993431 |
| 35 | <i>Vormela peregusna</i> | 28.875195 | 45.160312 |
| 36 | <i>Vormela peregusna</i> | 28.811609 | 45.161338 |
| 37 | <i>Vormela peregusna</i> | 28.427784 | 45.076765 |
| 38 | <i>Vormela peregusna</i> | 28.468417 | 44.175991 |
| 39 | <i>Vormela peregusna</i> | 28.28277  | 44.268259 |
| 40 | <i>Vormela peregusna</i> | 27.716273 | 44.048133 |
| 41 | <i>Vormela peregusna</i> | 28.486627 | 44.895973 |
| 42 | <i>Vormela peregusna</i> | 28.361075 | 44.942549 |
| 43 | <i>Vormela peregusna</i> | 29.267361 | 45.423246 |
| 44 | <i>Vormela peregusna</i> | 28.215508 | 44.043912 |
| 45 | <i>Vormela peregusna</i> | 28.365349 | 45.122538 |
| 46 | <i>Vormela peregusna</i> | 28.875195 | 45.160312 |
| 47 | <i>Vormela peregusna</i> | 28.589847 | 44.039315 |
| 48 | <i>Vormela peregusna</i> | 28.539164 | 44.490165 |
| 49 | <i>Vormela peregusna</i> | 28.649732 | 43.948431 |
| 50 | <i>Vormela peregusna</i> | 28.685756 | 45.208275 |
| 51 | <i>Vormela peregusna</i> | 28.432288 | 45.256744 |
| 52 | <i>Vormela peregusna</i> | 28.875195 | 45.160312 |
| 53 | <i>Vormela peregusna</i> | 28.742542 | 44.982375 |

|    |                          |           |           |
|----|--------------------------|-----------|-----------|
| 54 | <i>Vormela peregusna</i> | 28.033013 | 44.315806 |
| 55 | <i>Vormela peregusna</i> | 27.976314 | 44.676417 |
| 56 | <i>Vormela peregusna</i> | 28.177446 | 45.259656 |
| 57 | <i>Vormela peregusna</i> | 28.662328 | 44.39841  |
| 58 | <i>Vormela peregusna</i> | 27.716273 | 44.048133 |
| 59 | <i>Vormela peregusna</i> | 28.803113 | 44.891413 |
| 60 | <i>Vormela peregusna</i> | 28.177446 | 45.259656 |
| 61 | <i>Vormela peregusna</i> | 28.65348  | 44.083429 |
| 62 | <i>Vormela peregusna</i> | 28.803113 | 44.891413 |
| 63 | <i>Vormela peregusna</i> | 28.662328 | 44.39841  |
| 64 | <i>Vormela peregusna</i> | 27.655353 | 44.183549 |
| 65 | <i>Vormela peregusna</i> | 28.432288 | 45.256744 |
| 66 | <i>Vormela peregusna</i> | 28.432288 | 45.256744 |
| 67 | <i>Vormela peregusna</i> | 28.472906 | 44.355995 |
| 68 | <i>Vormela peregusna</i> | 28.242142 | 45.303979 |
| 69 | <i>Vormela peregusna</i> | 28.468417 | 44.175991 |
| 70 | <i>Vormela peregusna</i> | 28.65348  | 44.083429 |
| 71 | <i>Vormela peregusna</i> | 28.926682 | 44.799372 |
| 72 | <i>Vormela peregusna</i> | 28.177446 | 45.259656 |
| 73 | <i>Vormela peregusna</i> | 28.650979 | 43.993431 |
| 74 | <i>Vormela peregusna</i> | 28.360013 | 44.897551 |
| 75 | <i>Vormela peregusna</i> | 28.157502 | 44.269597 |
| 76 | <i>Vormela peregusna</i> | 28.65348  | 44.083429 |
| 77 | <i>Vormela peregusna</i> | 28.427784 | 45.076765 |
| 78 | <i>Vormela peregusna</i> | 28.589847 | 44.039315 |
| 79 | <i>Vormela peregusna</i> | 28.033013 | 44.315806 |
| 80 | <i>Vormela peregusna</i> | 28.28277  | 44.268259 |
| 81 | <i>Vormela peregusna</i> | 27.655353 | 44.183549 |

|     |                          |            |           |
|-----|--------------------------|------------|-----------|
| 82  | <i>Vormela peregusna</i> | 28.468417  | 44.175991 |
| 83  | <i>Vormela peregusna</i> | 27.963717  | 43.911259 |
| 84  | <i>Vormela peregusna</i> | 67.723692  | 38.539821 |
| 85  | <i>Vormela peregusna</i> | 65.716667  | 31.616671 |
| 86  | <i>Vormela peregusna</i> | 34.849674  | 32.165619 |
| 87  | <i>Vormela peregusna</i> | 47.064999  | 34.314171 |
| 88  | <i>Vormela peregusna</i> | 56.933331  | 37.516392 |
| 89  | <i>Vormela peregusna</i> | 48.333302  | 33.505508 |
| 90  | <i>Vormela peregusna</i> | 96.570313  | 61.721541 |
| 91  | <i>Vormela peregusna</i> | 46.715819  | 43.847118 |
| 92  | <i>Vormela peregusna</i> | 96.570313  | 61.721541 |
| 93  | <i>Vormela peregusna</i> | 28.53      | 45.02     |
| 94  | <i>Vormela peregusna</i> | 28.43      | 44.37     |
| 95  | <i>Vormela peregusna</i> | 82.4851    | 45.0422   |
| 96  | <i>Vormela peregusna</i> | 34.591193  | 31.444447 |
| 97  | <i>Vormela peregusna</i> | 100.170554 | 39.158514 |
| 98  | <i>Vormela peregusna</i> | 87.857     | 44.413    |
| 99  | <i>Vormela peregusna</i> | 107.735588 | 37.809974 |
| 100 | <i>Vormela peregusna</i> | 85.732745  | 46.79415  |
| 101 | <i>Vormela peregusna</i> | 127.412612 | 46.090552 |

---

**Figure S1 Comparison of AUC, kappa coefficient, and TSS evaluations of 9 models.**

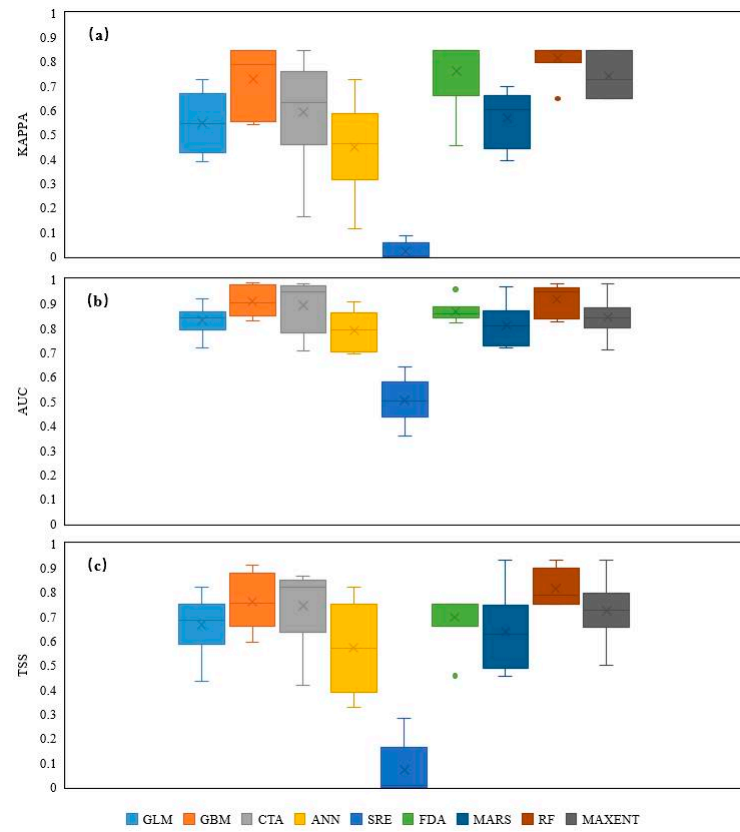

Supplement: s1 [file s1]
